# Supplementary material for: Behavioral adjustments to prior predation experience and food deprivation of a common cyprinid fish species vary between singletons and a group
Source: PeerJ. 2019 Jul 8;7:e7236. doi: 10.7717/peerj.7236 (PMC6622156; doi:10.7717/peerj.7236)
Supplement: Data S1 — The raw data of body size and behavioral parameters of each fish was given in this file. [file peerj-07-7236-s001.xlsx]

## Sheet: exp. 1
	Experiment 1-Predator treatment
	Singleton-Control						Singleton-Predator-experienced
	NO.	body mass	body length	Speed while moving	Percent time moving	Distance to predator	NO.	body mass	body length	Speed while moving	Percent time moving	Distance to predator
	1	3.81	5.95	4.19598	58.9	16.528	1	3.58	5.5	3.32879	15.08	34.268
	2	3.44	5.65	4.0474	17.02	31.2186	2	2.31	4.85	2.7628	14.67	25.5371
	3	4.37	6.15	2.70222	14.4	10.5228	3	2.84	5.1	2.45645	6.71	10.116
	4	2.3	4.95	2.75442	11.83	18.5526	4	2.79	5.08	2.61418	2.6	28.6683
	5	2.91	5.29	3.48345	3.57	30.1543	5	3.16	5.35	2.32178	4.56	38.0694
	6	3.39	5.6	2.864	9.24	43.8609	6	2.74	5.1	2.49597	6.19	44.3394
	7	3.79	5.75	2.77069	9.64	9.67524	7	2.56	4.82	2.88612	10.91	20.4692
	8	5.45	6.06	3.47679	24.61	22.5886	8	2.52	4.93	3.38686	3.77	33.2092
	9	5	6.5	3.2732	20.64	27.7496	9	3.68	5.49	2.85956	17.68	40.1025
	10	6.74	7.15	2.69	5.48	16.7227	10	2.26	4.6	2.83927	2.85	20.6831
	11	1.96	4.85	2.85748	9.88	31.3269	11	3.87	5.5	2.818	11.39	20.1188
	12	2.85	5.4	2.9361	22.42	20.3164	12	3.86	5.66	3.30775	3.24	28.8431
	13	2.77	5.3	3.47399	5.86	35.0475	13	2.69	4.77	2.96997	3.69	39.1565
	14	2.46	5.1	2.96727	28.23	23.422	14	3.48	5.49	2.52534	19.83	37.2623
	15	4.74	6.45	2.42067	12.82	18.2588	15	3.44	4.98	2.46171	10.97	28.2594
	16	2.87	5.25	2.93253	8.12	27.2961	16	2.43	4.8	3.0896	1.74	26.2291
	17	2.48	5.35	2.98046	16.61	14.5796	17	2	4.5	3.26839	15.47	30.6
	18	4.23	6.15	2.76734	13.45	25.0762	18	4.05	5.78	2.30842	0.33	43.72
	19	4.05	6.1	2.65394	31.5	36.6722	19	2.73	5.09	3.06289	24.89	19.2034
	20	2.2	5.05	4.06015	70.75	17.0127	20	2.73	4.84	3.05431	8	22.2092
	mean	3.5905	5.7025	3.1154	19.7485	23.8291	mean	2.986	5.1115	2.84091	9.2285	29.5532
	s.d.	1.23621	0.602083	0.513063	17.283	9.05531	s.d.	0.606772	0.364277	0.342877	6.87304	9.20724
	s.e.	0.276425	0.13463	0.114724	3.86459	2.02483	s.e.	0.135678	0.0814548	0.0766696	1.53686	2.0588
	Group-Control						Group-Predator-experienced
	NO.	body mass	body length	Speed while moving	Percent time moving	Distance to predator	NO.	body mass	body length	Speed while moving	Percent time moving	Distance to predator
	1	4.4	5.55	2.67357	29.95	32.1994	1	3.04	5.26	3.10476	23.41	18.4456
	2	3.85	5.35	3.63942	60.37	28.3974	2	3.85	5.6	3.57359	9.38	39.1713
	3	3.48	5.3	3.34503	63.58	31.4626	3	4.17	5.7	4.43071	60.06	18.4941
	4	3.45	5.5	3.7765	34.37	15.1067	4	2.86	5.1	3.10308	1.47	29.9105
	5	4.03	5.5	2.95458	59.99	24.9672	5	4.13	6.05	2.73553	20.53	25.7719
	6	4.57	5.75	3.58356	62.95	22.0336	6	2.96	5	3.11763	42.31	24.1131
	7	3	4.95	3.47977	53.25	22.9601	7	4.7	6	3.47099	75.61	26.0371
	8	3.52	5.3	3.14607	25.89	12.0666	8	3.64	5.4	4.62292	66.78	23.5393
	9	4.02	5.55	3.09302	43.78	29.1342	9	4.23	5.95	3.4092	47.64	23.1754
	10	3.02	5.15	3.4467	5.49	17.6652	10	3.4	5.2	4.02553	55.54	29.3988
	11	3.06	5.45	2.99314	51.91	16.3341	11	3.41	5.25	3.42615	45	30.7342
	12	3.65	5.6	4.28647	14.2	20.7769	12	3.15	5.6	4.14419	48.55	16.5914
	13	2.82	4.8	3.34953	56.29	20.1224	13	5.08	6.05	5.16463	80.83	19.7755
	14	3.14	5.05	2.88702	40.9	30.4728	14	3.05	5.25	4.01654	76	26.0343
	15	4.72	5.9	3.65582	56.29	26.5741	15	3.07	5.04	4.00026	59.86	17.7019
	16	3.15	4.8	3.25416	40.1	17.0736	16	3.52	5.4	2.91425	27.09	18.766
	17	4.27	5.7	2.95083	41.83	23.7419	17	4.54	5.9	4.37528	90.7	27.4995
	18	3	5.25	3.27583	46.7	23.2836	18	3.56	5.61	2.68649	38.68	31.3564
	19	2.98	5.3	3.27583	69.5	19.4311	19	3.98	5.9	3.57815	79.88	21.4243
	20	3.73	5.05	3.35733	70.17	20.58	20	2.29	4.75	3.80515	86.47	17.3766
	mean	3.593	5.34	3.32121	46.3755	22.7192	mean	3.6315	5.5005	3.68525	51.7895	24.2659
	s.d.	0.586004	0.306337	0.365856	17.718	5.69929	s.d.	0.700836	0.392448	0.663111	26.0908	5.93093
	s.e.	0.131035	0.0684989	0.081808	3.96188	1.2744	s.e.	0.156712	0.0877541	0.148276	5.83407	1.3262

## Sheet: exp. 2
	Experiment 2-Starvation treatment
	Singleton-Control						Singleton-Starved
	NO.	body mass	body length	Speed while moving	Percent time moving	Distance to food	NO.	body mass	body length	Speed while moving	Percent time moving	Distance to food
	1	4.31	5.9	2.53358	8.73	27.4297	1	1.8	4.6	2.68468	9.44	33.9182
	2	3.86	5.8	3.36764	42.77	28.3655	2	2.12	4.8	3.97545	20.43	41.9414
	3	3.17	5.2	2.90578	12.41	24.0982	3	3.53	5.8	3.14288	6.85	34.7741
	4	3.45	5.45	3.3958	47.97	1.13365	4	3.6	5.9	3.70581	33.64	20.5723
	5	2.55	5.05	3.60511	37.47	28.3327	5	2.56	5	2.97562	46.72	25.5486
	6	4.28	5.3	3.63763	31.82	21.0677	6	3.58	5.65	2.90417	11.43	7.72078
	7	3.62	5.75	2.81506	21.29	29.5018	7	4.9	6.15	3.08261	63.86	17.5998
	8	2.78	4.95	2.82116	7.79	32.5047	8	3.28	5.05	3.64669	28.63	33.5886
	9	3.63	5.6	2.709	11.43	40.6106	9	5.04	6.1	2.78504	31.39	31.0227
	10	2.86	5.3	2.72001	14.33	25.9374	10	4.95	6.19	2.52643	26.78	23.3125
	11	1.91	4.5	2.73811	10.28	21.6231	11	1.79	4.56	3.6381	26.78	23.3125
	12	2.25	4.7	2.59893	21.55	24.7219	12	3.8	6.05	3.3896	41.23	20.1809
	13	3.28	5.15	2.83199	21.41	35.4842	13	3.53	5.75	3.82956	36.65	25.3747
	14	3.02	5	2.82243	33.16	12.7065	14	2.83	5.25	3.01989	34.7435	22.8543
	15	3.52	5.1	3.5399	14.96	14.7605	15	2.32	5.25	3.09584	32.75	26.7987
	16	3.85	5.35	2.96638	5.79	35.3851	16	6.13	6.8	3.96511	0.15774	28.0834
	17	2.81	5.25	2.93384	11.75	28.3337	17	4.12	5.9	2.76549	21.25	30.1874
	18	2.22	4.4	2.64997	10.98	29.427	18	3.11	5.55	3.97796	22.6249	17.2764
	19	1.84	4.25	3.42174	23.68	23.5423	19	2.03	4.65	3.25708	43.29	24.4925
	20	3.29	5.25	3.00406	70.75	16.992	20	3.39	5.78	3.65362	38.84	26.3912
	mean	3.125	5.1625	3.00091	23.016	25.0979	mean	3.4205	5.539	3.30108	28.8743	25.7475
	s.d.	0.724071	0.448059	0.355914	16.6111	8.93655	s.d.	1.18175	0.619005	0.467617	15.0617	7.50207
	s.e.	0.161907	0.100189	0.0795848	3.71436	1.99827	s.e.	0.264247	0.138414	0.104562	3.36791	1.67751
	Group-Control						Group-Starved
	NO.	body mass	body length	Speed while moving	Percent time moving	Distance to food	NO.	body mass	body length	Speed while moving	Percent time moving	Distance to food
	1	3.98	5.8	2.77848	28.01	26.5691	1	5.16	6.42	4.0346	74.78	24.6363
	2	3.39	5.3	3.1913	39.29	33.7138	2	5.97	6.7	3.42653	77.08	25.5121
	3	4.2	5.35	2.79231	26.62	19.6835	3	5.94	6.7	3.71724	68.23	25.1865
	4	3.09	5.25	3.20494	40.43	14.308	4	3.41	5.15	3.59111	52.13	23.7179
	5	3.6	5.45	3.40664	54.82	24.792	5	2.97	4.25	3.48042	57.86	20.2543
	6	3.27	5.35	3.2804	58.25	22.9277	6	2.35	5	2.97184	73.38	22.4394
	7	3.46	5.6	3.2804	63.91	16.7571	7	3.77	5.9	3.38615	58.09	25.2324
	8	2.72	5.1	3.39664	45.7	16.4075	8	3	5.15	3.50267	77.95	27.1853
	9	3.69	5.45	3.48875	50.12	27.7984	9	4.2	6.1	3.4518	53.96	12.4881
	10	4.36	6	3.20154	57.17	26.7762	10	2.22	4.9	3.40993	55.66	22.8549
	11	4.71	6	3.68924	36.15	13.7696	11	3.63	5.85	3.49315	75.98	26.5932
	12	4.5	5.94	3.49433	72.41	17.4683	12	2.72	4.25	3.59553	53.6	16.5996
	13	3.47	5.34	4.32661	26.44	23.1324	13	2.43	4.95	3.64553	61.65	21.5042
	14	2.98	5.2	2.75673	81.58	25.5862	14	2.42	5	3.47622	54.25	23.7258
	15	3.32	5.43	3.87129	61.89	19.8489	15	3.83	5.85	3.7375	78.21	21.7672
	16	3.72	5.63	3.63615	77.31	14.6644	16	4.34	5.35	3.65801	73.93	19.2771
	17	4.58	5.9	4.50983	60.46	23.0042	17	4.19	6	4.04484	60.85	27.1704
	18	2.79	5.18	3.77363	48.52	29.8106	18	3.83	5.65	3.31034	77.99	23.9482
	19	3.66	5.4	4.18093	45.67	15.766	19	4.56	6.1	3.25352	73.94	19.2771
	20	2.65	4.39	3.03885	63.65	25.521	20	5.82	6.75	3.64181	73.63	23.9353
	mean	3.607	5.453	3.46495	51.92	21.9152	mean	3.838	5.601	3.54144	66.6575	22.6653
	s.d.	0.622179	0.377235	0.491141	16.1697	5.71454	s.d.	1.20154	0.762178	0.245063	9.94826	3.68471
	s.e.	0.139123	0.0843523	0.109823	3.61565	1.27781	s.e.	0.268672	0.170428	0.0547977	2.2245	0.823926

## Sheet: exp. 3
	Experiment 3-Double treatment
	Singleton-Control						Singleton-Predator-experienced						Singleton-Starved						Singleton-Double treatment
	NO.	body mass	body length	Speed while moving	Percent time moving	Distance to predator/food	NO.	Body mass	Body length	Speed while moving	Percent time moving	Distance to predator/food	NO.	body mass	body length	Speed while moving	Percent time moving	Distance to predator/food	NO.	body mass	body length	Speed while moving	Percent time moving	Distance to predator/food
	1	3.51	5.25	3.74289	38.05	22.9056	1	2.99	5.4	3.50379	2.26	32.2002	1	3.91	6.15	3.58946	15.87	23.9673	1	2.06	4.2	2.71921	41.96	20.5237
	2	2.46	4.85	2.77282	33.95	21.2448	2	4	5.4	2.65586	10.5	41.5829	2	3.48	5.95	3.13915	7.52	9.236	2	2.76	5.25	2.88703	14.77	35.4561
	3	3.91	5.1	2.95286	8.08	15.9662	3	3.5	5.3	2.65484	5.93	31.1248	3	2.64	4.3	3.67394	37.11	21.7756	3	3.14	5.35	2.78291	12.12	11.0652
	4	3.52	5.92	3.05321	3.59	28.8425	4	2.4	4.85	2.7041	16.71	15.2906	4	2.52	4.25	4.11491	34.65	27.9108	4	1.98	4.15	3.01131	35.48	19.7187
	5	3.16	5.45	2.89083	16.46	40.8441	5	3.46	5.32	2.96916	6.13	26.8933	5	2.66	5.1	3.44051	26.97	19.8677	5	2.41	5	3.34109	37.6	16.3034
	6	3.24	5.65	3.3202	4.38	24.0242	6	3.34	5.35	2.89586	30.87	29.3337	6	2.79	5.3	3.37024	37.67	14.5721	6	2.62	5.2	2.66201	20.19	38.3998
	7	3.79	5.6	2.86889	23.05	25.5869	7	3.06	5.05	2.94015	8.07	26.938	7	3.02	5.05	3.54615	55.44	1.31487	7	2.01	4.3	2.64972	38.32	28.1516
	8	2.68	5.2	2.61154	22.38	12.9623	8	3.49	5.4	3.25221	11.6	28.4828	8	3.99	5.95	4.25318	49.5	28.6689	8	2.43	5	2.90963	42.37	24.645
	9	2.33	4.8	3.32365	46.79	30.3765	9	4.52	5.64	3.51963	24.51	32.9075	9	3.26	5.65	3.36929	45.7	27.9657	9	2.75	5.4	3.24229	61.27	26.757
	10	3.05	5.3	2.50553	17.04	11.5244	10	3.71	5.57	3.07382	10.88	27.2978	10	1.67	4.45	4.13382	51.48	29.8093	10	2.68	5.2	3.075	46.4	28.0369
	11	3.5	5.55	2.79492	38.54	19.5476	11	3.03	5.2	3.90923	5.99	15.5172	11	3.94	5.98	2.94194	19.88	35.1853	11	3.6	5.1	2.91442	23.61	26.1834
	12	2.42	4.9	3.41888	9.49	45.4479	12	3.76	5.45	3.2628	5.02	32.2942	12	5.04	6.55	3.96468	5.2	52.2606	12	4.62	6.15	2.60041	14.84	36.6164
	13	4.19	6	4.1916	12.84	14.0962	13	3.01	5.2	3.37075	9.23	34.1365	13	4.44	6.18	3.39398	26.5	13.7583	13	3.17	5.35	2.72536	5.89	33.7092
	14	3.5	5.6	3.21938	29.44	30.6429	14	3.08	5.2	2.87748	2.06	37.4419	14	2.28	3.1	2.91453	49.12	25.8572	14	2.91	5.05	2.53399	3.33	33.6952
	15	3.27	5.45	2.97958	45.22	26.3513	15	4.01	5.75	3.23701	14.68	17.977	15	4.51	6.15	4.13692	24.88	44.1086	15	2.68	5.15	2.63973	6	32.6711
	16	3.44	5.6	3.04146	6.21	28.7817	16	3.16	5.2	2.38667	15.35	19.2815	16	2.01	4.6	3.19471	19.66	33.6102	16	2.18	5.3	2.72772	5.39	34.4149
	17	2.41	5.1	2.83641	10.49	21.8635	17	2.79	5	3.29907	2.59	37.1188	17	3.53	5.67	4.04504	45.27	19.5513	17
	18	5.04	6.15	2.39552	15.39	9.97511	18	3.82	5.45	2.70569	16.21	40.3336	18	3.76	5.7	2.95932	43.72	29.4123	18
	19	4.41	5.85	2.39552	13.87	6.55303	19	3.25	5.22	3.75536	49.1	18.6041	19	1.69	4.5	4.11155	30.26	13.8907	19
	20						20	3.98	5.55	2.86153	27.63	19.4051	20						20
	mean	3.35947	5.43789	3.01661	20.8032	23.0283	mean	3.418	5.325	3.09175	13.766	28.2081	mean	3.21789	5.29368	3.59438	32.9684	24.8802	mean	2.75	5.07187	2.83886	25.5962	27.8967
	s.d.	0.725446	0.390378	0.452177	13.9195	10.1086	s.d.	0.506335	0.220084	0.398113	11.6853	8.1965	s.d.	0.970828	0.894596	0.455191	15.024	12.008	s.d.	0.671307	0.500989	0.23277	17.8556	7.87408
	s.e.	0.166429	0.089559	0.103736	3.19334	2.31907	s.e.	0.11322	0.0492122	0.0890207	2.61291	1.83279	s.e.	0.222723	0.205234	0.104428	3.44675	2.75483	s.e.	0.167827	0.125247	0.0581924	4.4639	1.96852
	Group-Control						Group-Predator-experienced						Group-Starved						Group-Double treatment
	NO.	body mass	body length	Speed while moving	Percent time moving	Distance to predator/food	NO.	Body mass	Body length	Speed while moving	Percent time moving	Distance to predator/food	NO.	body mass	body length	Speed while moving	Percent time moving	Distance to predator/food	NO.	body mass	body length	Speed while moving	Percent time moving	Distance to predator/food
	1	2.65	5.12	3.38158	63.95	23.4325	1	3.53	5.5	3.29152	59.39	29.1657	1	2.26	5.15	3.16813	49.8936	25.0261	1	2.86	5.25	3.1721	59.52	16.9666
	2	3.32	5.36	3.19241	45.84	31.6942	2	3.47	5.45	2.59495	26.21	39.1884	2	2.32	5	3.24369	57.57	20.5566	2	2.04	4.8	2.98535	33.39	10.2114
	3	4.4	5.9	3.99875	62.11	23.6028	3	2.24	4.66	3.54235	51.23	25.7153	3	3.83	5.8	3.14037	64.94	23.1688	3	3.12	5.2	3.81651	69.62	27.8583
	4	4.66	6.1	3.80824	67.6	18.4148	4	4.36	5.83	3.49199	59.53	21.4492	4	2.66	5.45	2.72369	53.99	25.1132	4	2.57	5.15	2.85906	27.94	37.7686
	5	4.42	5.97	2.82996	30.04	34.5967	5	4.81	6	4.10415	19.09	11.4228	5	2.93	5.5	3.52789	72.86	24.2919	5	3.74	5.4	3.21295	58.06	20.2747
	6	2.5	4.75	2.62164	26.28	39.7386	6	4.12	5.9	3.08248	36.94	26.2242	6	3.52	5.85	3.35507	68.69	23.6931	6	3.66	5.45	2.92869	30.86	36.7519
	7	2.77	5.09	3.7156	42.58	9.51394	7	4.85	5.9	3.33501	66.69	32.0717	7	2.63	5.2	3.65734	55.28	18.5643	7	2.33	5	3.21154	74.16	27.8194
	8	4.6	5.9	2.99203	15.83	30.8525	8	4	5.5	3.88732	65.04	19.3654	8	2.11	4.85	3.47208	58.84	17.3968	8	1.98	4.55	3.17935	24.55	7.07444
	9	3.29	5.45	2.90446	34.03	31.796	9	3.19	5.3	3.60796	67.92	20.9095	9	3.61	5.95	3.35331	58.58	28.6245	9	3.07	5.4	3.15364	44.57	23.4854
	10	2.73	5.5	3.55295	37.96	18.2251	10	3.53	5.25	3.49809	60.51	21.7168	10	3.07	5.65	3.42711	71.69	18.3664	10	2.77	5.15	3.0088	30.87	18.5463
	11	3.37	5.17	3.2712	19.41	34.3648	11	2.33	4.7	3.20257	60.89	21.2687	11	2.18	4.95	3.74252	70.41	22.4333	11	3.56	5.7	2.60629	41.87	35.5675
	12	2.72	5.18	2.88438	14.36	25.1312	12	2.44	4.9	3.43074	68.45	28.4718	12	4.01	6.2	3.1134	35.92	17.0355	12	3.85	5.6	3.70415	80.85	23.4913
	13	3.66	5.05	3.59666	75.16	23.3402	13	4.42	5.75	3.26191	69.23	20.5421	13	5.92	7.3	3.5153	50.71	16.5973	13	2.69	4.85	3.72353	66.82	19.9336
	14	2.7	5.02	3.33365	58.32	29.0904	14	3.92	5.55	3.38769	39.68	22.4206	14	2.28	4.3	3.61594	64.03	25.7764	14	2.38	4.95	2.91965	54.2	14.9126
	15	2.85	5	4.12236	29.31	29.6964	15	4.14	5.82	3.23838	52.75	32.2601	15	2.69	5.25	3.67978	56.45	21.4795	15	2.31	4.85	2.89046	47.08	32.1931
	16	4.15	5.9	3.80831	78.85	18.7822	16	4.44	5.9	2.99091	20.88	25.6441	16	3.02	5	3.02542	63.54	20.4045	16	2.02	4.8	2.96807	54.61	10.3942
	17	3.11	5.4	3.11849	44.83	23.9018	17	3.98	5.85	3.59742	66.46	18.5159	17	4.92	6.85	2.86602	46.13	33.4127	17	2.64	4.95	3.13311	45.46	27.0976
	18	4.03	5.85	3.05499	14.99	41.7471	18	4.34	5.9	3.03095	27.47	30.1826	18	4.63	6	3.72227	64.82	26.7739	18	2.7	5.2	3.17345	46.83	25.0522
	19	4.15	5.65	3.36055	38.53	30.3999	19	3.57	5.65	2.89273	62.56	28.7176	19	2.43	5	3.67408	77.79	24.1945	19	2.53	5.05	2.85961	32.72	35.6107
	20	1.98	4.45	2.93202	18.89	8.24121	20	4.71	6.15	3.08649	64.893	19.2602	20	3.66	5.95	3.28701	69.59	20.3636	20	2.8	5.05	2.54255	52.88	22.6758
	mean	3.403	5.3905	3.32401	40.9435	26.3281	mean	3.8195	5.573	3.32778	52.2907	24.7256	mean	3.234	5.56	3.36552	60.5862	22.6636	mean	2.781	5.1175	3.10244	48.843	23.6843
	s.d.	0.802969	0.451308	0.420011	20.6882	8.86267	s.d.	0.787096	0.425368	0.344804	17.2486	6.26889	s.d.	1.03207	0.709448	0.292608	10.2722	4.25085	s.d.	0.56871	0.292122	0.334672	16.1493	9.12577
	s.e.	0.179549	0.100915	0.0939174	4.62602	1.98175	s.e.	0.176	0.0951152	0.0771005	3.85691	1.40177	s.e.	0.230778	0.158637	0.0654292	2.29693	0.950519	s.e.	0.127167	0.0653206	0.074835	3.61109	2.04058
